# Supplementary material for: Evaluation of the efficacy of a self-cleaning automated compounding system for the decontamination of cytotoxic drugs
Source: PubMed Central journal article supplement — J Oncol Pharm Pract. 2020 Aug 27;27(6):1343–53. doi: 10.1177/1078155220951866 (PMC8438772; doi:10.1177/1078155220951866), 2020-08-27
Supplement: sj-pdf-1-opp-10.1177_1078155220951866.pdf [file sj-pdf-1-opp-10.1177_1078155220951866.pdf]

## Supplementary Tables

**STable 1.** Analytical limit of quantification (LOQ) and method uncertainty reported by the test laboratory for Multimethod 2, with corresponding calculated uncertainty limits (100% analytical recovery  $\pm$  uncertainty), and cytotoxic drug levels determined in duplicated analytical measurements in a wipe with 18000 ng of each drug and a wipe with 180 ng of each drug (mean  $\pm$  standard deviation; n= 2) with corresponding calculated analytical recovery rates.

| Cytotoxic drug   | LOQ<br>(ng/sample) | Uncertainty<br>(%) | Uncertainty<br>Limits<br>(%) | 180 ng/sample                     |                               | 18000 ng/sample                |                               |
|------------------|--------------------|--------------------|------------------------------|-----------------------------------|-------------------------------|--------------------------------|-------------------------------|
|                  |                    |                    |                              | Drug<br>quantified<br>(ng/sample) | Analytical<br>recovery<br>(%) | Drug quantified<br>(ng/sample) | Analytical<br>recovery<br>(%) |
| Carboplatin      | 0.2                | 26                 | 74-126                       | 140 $\pm$ 0                       | 78                            | 14500 $\pm$ 707                | 81                            |
| Methotrexate     | 3                  | 28                 | 72-128                       | 175 $\pm$ 21                      | 97                            | 23500 $\pm$ 12121              | 131                           |
| Gemcitabine      | 3                  | 29                 | 71-129                       | 78 $\pm$ 1                        | 43                            | 18000 $\pm$ 1414               | 100                           |
| Etoposide        | 3                  | 30                 | 70-130                       | 160 $\pm$ 42                      | 89                            | 22500 $\pm$ 3536               | 125                           |
| Ifosfamide       | 3                  | 35                 | 65-135                       | 94 $\pm$ 8                        | 52                            | 14000 $\pm$ 2828               | 78                            |
| Cyclophosphamide | 3                  | 31                 | 69-131                       | 180 $\pm$ 28                      | 100                           | 21500 $\pm$ 707                | 119                           |
| 5-Fluorouracil   | 10                 | 30                 | 70-130                       | 69 $\pm$ 12                       | 38                            | 14500 $\pm$ 707                | 81                            |
| Paclitaxel       | 10                 | 88                 | 12-188                       | 53 $\pm$ 17                       | 29                            | 8900 $\pm$ 0                   | 49                            |
| Docetaxel        | 20                 | 51                 | 49-151                       | 98 $\pm$ 32                       | 54                            | 15500 $\pm$ 707                | 86                            |

**STable 2.** Cytotoxic drug levels determined on surface wipe samples before self-cleaning on three independent days (mean  $\pm$  standard deviation; n= 3) for two drug contamination levels (D1= 1 ng/cm<sup>2</sup>= 150 ng/150 cm<sup>2</sup>) and D100= 100 ng/cm<sup>2</sup>= 15000 ng/150 cm<sup>2</sup>) and corresponding calculated wiping recovery rates. The surfaces were spiked prior to using each of the two self-cleaning methods studied.

| Cytotoxic drug   | D1 (150 ng/150 cm <sup>2</sup> ) |                     | D100 (15000 ng/150 cm <sup>2</sup> ) |                     |
|------------------|----------------------------------|---------------------|--------------------------------------|---------------------|
|                  | Drug quantified (ng/sample)      | Wiping recovery (%) | Drug quantified (ng/sample)          | Wiping recovery (%) |
| Carboplatin      | 93 $\pm$ 10                      | 62                  | 10225 $\pm$ 147                      | 68                  |
| Methotrexate     | 120 $\pm$ 18                     | 80                  | 12775 $\pm$ 2323                     | 85                  |
| Gemcitabine      | 101 $\pm$ 17                     | 67                  | 11750 $\pm$ 2486                     | 79                  |
| Etoposide        | 125 $\pm$ 28                     | 83                  | 15250 $\pm$ 2373                     | 102                 |
| Ifosfamide       | 107 $\pm$ 16                     | 71                  | 12700 $\pm$ 2647                     | 85                  |
| Cyclophosphamide | 159 $\pm$ 30                     | 106                 | 17300 $\pm$ 3167                     | 115                 |
| 5-Fluorouracil   | 118 $\pm$ 13                     | 79                  | 13175 $\pm$ 1614                     | 88                  |
| Paclitaxel       | 44 $\pm$ 9                       | 29                  | 7700 $\pm$ 1531                      | 52                  |
| Docetaxel        | 91 $\pm$ 13                      | 61                  | 12725 $\pm$ 1531                     | 85                  |
